# Supplementary material for: Addressing Industrial Waste Heat Supply Variability With Organic Rankine Cycle Systems Incorporating Thermal Energy Storage
Source: Research Square preprint supplement (doi:10.21203/rs.3.rs-658624/v1), 2021-07-07
Supplement: Supplementary file 1 [file 1764cb5f8263d3380b081e84.docx]

**Graphical Abstract**
